# Supplementary material
Source: HighWire-hosted journal article supplement (https://bmjopen.bmj.com/content/12/8/e063009)
Supplement: inline-supplementary-material-1 [file inline-supplementary-material-1.pdf]

## Parents' questionnaire on the suitability for daily use and practical implementation of the new "Diagnosis and Treatment Standard for Neonatal Hypoglycaemia ( $\geq 35+0$ weeks of gestation)"

Dear parents,

we would like to thank you again for participating in the ProBrain study.

We would like to ask you a few questions about how you experienced the use of the new treatment standard for hypoglycaemia in neonates.

Who completes this questionnaire:  mother  father  both parents

Please indicate to what extent the statements apply to you.

### Example:

| Statement | strongly disagree             | disagree                      | slightly disagree             | slightly agree                | agree                         | strongly agree                |
|-----------|-------------------------------|-------------------------------|-------------------------------|-------------------------------|-------------------------------|-------------------------------|
|           | <input type="checkbox"/><br>0 | <input type="checkbox"/><br>1 | <input type="checkbox"/><br>2 | <input type="checkbox"/><br>3 | <input type="checkbox"/><br>4 | <input type="checkbox"/><br>5 |

|                                                                                                                               |                               |                               |                               |                               |                               |                               |
|-------------------------------------------------------------------------------------------------------------------------------|-------------------------------|-------------------------------|-------------------------------|-------------------------------|-------------------------------|-------------------------------|
| 1. The blood glucose measurements gave me a sense of reassurance.                                                             | <input type="checkbox"/><br>0 | <input type="checkbox"/><br>1 | <input type="checkbox"/><br>2 | <input type="checkbox"/><br>3 | <input type="checkbox"/><br>4 | <input type="checkbox"/><br>5 |
| 2. I understand the rationale for the blood glucose measurements.                                                             | <input type="checkbox"/><br>0 | <input type="checkbox"/><br>1 | <input type="checkbox"/><br>2 | <input type="checkbox"/><br>3 | <input type="checkbox"/><br>4 | <input type="checkbox"/><br>5 |
| 3. I consider regular blood glucose measurements to detect hypoglycaemia in my baby to be useful.                             | <input type="checkbox"/><br>0 | <input type="checkbox"/><br>1 | <input type="checkbox"/><br>2 | <input type="checkbox"/><br>3 | <input type="checkbox"/><br>4 | <input type="checkbox"/><br>5 |
| 4. The measurements made me more concerned and worried about my baby's health.                                                | <input type="checkbox"/><br>0 | <input type="checkbox"/><br>1 | <input type="checkbox"/><br>2 | <input type="checkbox"/><br>3 | <input type="checkbox"/><br>4 | <input type="checkbox"/><br>5 |
| 5. My baby's blood glucose measurements put additional burden on me.                                                          | <input type="checkbox"/><br>0 | <input type="checkbox"/><br>1 | <input type="checkbox"/><br>2 | <input type="checkbox"/><br>3 | <input type="checkbox"/><br>4 | <input type="checkbox"/><br>5 |
| 6. The blood glucose measurements stressed my baby.                                                                           | <input type="checkbox"/><br>0 | <input type="checkbox"/><br>1 | <input type="checkbox"/><br>2 | <input type="checkbox"/><br>3 | <input type="checkbox"/><br>4 | <input type="checkbox"/><br>5 |
| 7. I consider the burden of the measures to be well founded and justified.                                                    | <input type="checkbox"/><br>0 | <input type="checkbox"/><br>1 | <input type="checkbox"/><br>2 | <input type="checkbox"/><br>3 | <input type="checkbox"/><br>4 | <input type="checkbox"/><br>5 |
| 8. The flyer on hypoglycaemia in babies gave me enough information and educated me well on the subject.                       | <input type="checkbox"/><br>0 | <input type="checkbox"/><br>1 | <input type="checkbox"/><br>2 | <input type="checkbox"/><br>3 | <input type="checkbox"/><br>4 | <input type="checkbox"/><br>5 |
| 9. The information on the flyer worried me more than it helped me.                                                            | <input type="checkbox"/><br>0 | <input type="checkbox"/><br>1 | <input type="checkbox"/><br>2 | <input type="checkbox"/><br>3 | <input type="checkbox"/><br>4 | <input type="checkbox"/><br>5 |
| 10. Before I participated in the ProBrain study, I already knew that hypoglycaemia could occur in neonates.                   | <input type="checkbox"/><br>0 | <input type="checkbox"/><br>1 | <input type="checkbox"/><br>2 | <input type="checkbox"/><br>3 | <input type="checkbox"/><br>4 | <input type="checkbox"/><br>5 |
| 11. I was very worried that my baby would be given formula because of hypoglycaemia and would develop breastfeeding problems. | <input type="checkbox"/><br>0 | <input type="checkbox"/><br>1 | <input type="checkbox"/><br>2 | <input type="checkbox"/><br>3 | <input type="checkbox"/><br>4 | <input type="checkbox"/><br>5 |

|                                                                                                                                                                                          |                               |                               |                               |                               |                               |                               |
|------------------------------------------------------------------------------------------------------------------------------------------------------------------------------------------|-------------------------------|-------------------------------|-------------------------------|-------------------------------|-------------------------------|-------------------------------|
| 12. I think avoiding supplemental feeding of even small amounts of formula is important.                                                                                                 | <input type="checkbox"/><br>0 | <input type="checkbox"/><br>1 | <input type="checkbox"/><br>2 | <input type="checkbox"/><br>3 | <input type="checkbox"/><br>4 | <input type="checkbox"/><br>5 |
| 13. I would like to get more information in person by a doctor and/or nurses.                                                                                                            | <input type="checkbox"/><br>0 | <input type="checkbox"/><br>1 | <input type="checkbox"/><br>2 | <input type="checkbox"/><br>3 | <input type="checkbox"/><br>4 | <input type="checkbox"/><br>5 |
| 14. Following a precise scheme for the detection and treatment of hypoglycaemia in neonates makes me feel that hypoglycaemia in my baby can be detected early.                           | <input type="checkbox"/><br>0 | <input type="checkbox"/><br>1 | <input type="checkbox"/><br>2 | <input type="checkbox"/><br>3 | <input type="checkbox"/><br>4 | <input type="checkbox"/><br>5 |
| 15. The standard for detection and treatment of hypoglycaemia in neonates makes me feel that hypoglycaemia in my baby can be treated well.                                               | <input type="checkbox"/><br>0 | <input type="checkbox"/><br>1 | <input type="checkbox"/><br>2 | <input type="checkbox"/><br>3 | <input type="checkbox"/><br>4 | <input type="checkbox"/><br>5 |
| 16. I would recommend the Department of Obstetrics and Gynaecology at the University Hospital Düsseldorf because babies are cared for very carefully there with regard to hypoglycaemia. | <input type="checkbox"/><br>0 | <input type="checkbox"/><br>1 | <input type="checkbox"/><br>2 | <input type="checkbox"/><br>3 | <input type="checkbox"/><br>4 | <input type="checkbox"/><br>5 |
| 17. I will be happy to attend the scheduled follow-up visit when my child is two years old.                                                                                              | <input type="checkbox"/><br>0 | <input type="checkbox"/><br>1 | <input type="checkbox"/><br>2 | <input type="checkbox"/><br>3 | <input type="checkbox"/><br>4 | <input type="checkbox"/><br>5 |

Do you have any remarks/comments or suggestions for improvement?

---



---



---



---



---



---



---



---



---



---



---



---



---



---



---



---

**Thank you for your participation!**
