# Supplementary material
Source: HighWire-hosted journal article supplement (https://bmjopen.bmj.com/content/12/8/e063009)
Supplement: inline-supplementary-material-5 [file inline-supplementary-material-5.pdf]

## Survey on the 'Diagnosis and Treatment Standard for Neonatal Hypoglycaemia ( $\geq 35+0$ weeks of gestation)' - Physicians

Dear physicians of the Department for General Paediatrics, Neonatology and Paediatric Cardiology,

Thank you for taking the time to complete this questionnaire regarding the new diagnosis and treatment standard for neonatal hypoglycaemia. The survey is anonymous, so it is not possible to identify you. Please answer the questions truthfully. This is the only way we can adequately evaluate the standard and subsequently optimize it.

Occupation:

- Resident physician
- Attending physician
- Senior physician
- Fellow in neonatology

Please indicate to what extent the statements apply to you.

**Example:**

| Statement | strongly disagree             | disagree                      | slightly disagree             | slightly agree                | agree                         | strongly agree                |
|-----------|-------------------------------|-------------------------------|-------------------------------|-------------------------------|-------------------------------|-------------------------------|
|           | <input type="checkbox"/><br>0 | <input type="checkbox"/><br>1 | <input type="checkbox"/><br>2 | <input type="checkbox"/><br>3 | <input type="checkbox"/><br>4 | <input type="checkbox"/><br>5 |

|                                                                                                                                                             |                               |                               |                               |                               |                               |                               |
|-------------------------------------------------------------------------------------------------------------------------------------------------------------|-------------------------------|-------------------------------|-------------------------------|-------------------------------|-------------------------------|-------------------------------|
| 1. I use the standard in every child with neonatal hypoglycaemia.                                                                                           | <input type="checkbox"/><br>0 | <input type="checkbox"/><br>1 | <input type="checkbox"/><br>2 | <input type="checkbox"/><br>3 | <input type="checkbox"/><br>4 | <input type="checkbox"/><br>5 |
| 2. The diagnosis and treatment standard is clearly and logically structured.                                                                                | <input type="checkbox"/><br>0 | <input type="checkbox"/><br>1 | <input type="checkbox"/><br>2 | <input type="checkbox"/><br>3 | <input type="checkbox"/><br>4 | <input type="checkbox"/><br>5 |
| 3. The standard covers all aspects of neonatal hypoglycaemia management.                                                                                    | <input type="checkbox"/><br>0 | <input type="checkbox"/><br>1 | <input type="checkbox"/><br>2 | <input type="checkbox"/><br>3 | <input type="checkbox"/><br>4 | <input type="checkbox"/><br>5 |
| 4. The standard gives me confidence in handling blood glucose screening and hypoglycaemia management.                                                       | <input type="checkbox"/><br>0 | <input type="checkbox"/><br>1 | <input type="checkbox"/><br>2 | <input type="checkbox"/><br>3 | <input type="checkbox"/><br>4 | <input type="checkbox"/><br>5 |
| 5. I am always following the diagnosis and treatment procedures of the step-by-step flowchart of the standard.                                              | <input type="checkbox"/><br>0 | <input type="checkbox"/><br>1 | <input type="checkbox"/><br>2 | <input type="checkbox"/><br>3 | <input type="checkbox"/><br>4 | <input type="checkbox"/><br>5 |
| 6. The treatment steps in the standard are reasonable.                                                                                                      | <input type="checkbox"/><br>0 | <input type="checkbox"/><br>1 | <input type="checkbox"/><br>2 | <input type="checkbox"/><br>3 | <input type="checkbox"/><br>4 | <input type="checkbox"/><br>5 |
| 7. The intervals for blood glucose measurements specified in the standard are reasonable.                                                                   | <input type="checkbox"/><br>0 | <input type="checkbox"/><br>1 | <input type="checkbox"/><br>2 | <input type="checkbox"/><br>3 | <input type="checkbox"/><br>4 | <input type="checkbox"/><br>5 |
| 8. The standard leads to an unnecessary high number of blood glucose measurements.                                                                          | <input type="checkbox"/><br>0 | <input type="checkbox"/><br>1 | <input type="checkbox"/><br>2 | <input type="checkbox"/><br>3 | <input type="checkbox"/><br>4 | <input type="checkbox"/><br>5 |
| 9. Since the implementation of the standard, overtreatment of neonates with hypoglycaemia has occurred.                                                     | <input type="checkbox"/><br>0 | <input type="checkbox"/><br>1 | <input type="checkbox"/><br>2 | <input type="checkbox"/><br>3 | <input type="checkbox"/><br>4 | <input type="checkbox"/><br>5 |
| 10. With the standard, hypoglycaemia in at-risk newborns is more reliably detected and treated.                                                             | <input type="checkbox"/><br>0 | <input type="checkbox"/><br>1 | <input type="checkbox"/><br>2 | <input type="checkbox"/><br>3 | <input type="checkbox"/><br>4 | <input type="checkbox"/><br>5 |
| 11. The standard makes it easier for me to write orders to treat hypoglycaemia.                                                                             | <input type="checkbox"/><br>0 | <input type="checkbox"/><br>1 | <input type="checkbox"/><br>2 | <input type="checkbox"/><br>3 | <input type="checkbox"/><br>4 | <input type="checkbox"/><br>5 |
| 12. Since the implementation of standard, there have been fewer queries from nurses/midwives about the treatment and procedures for neonatal hypoglycaemia. | <input type="checkbox"/><br>0 | <input type="checkbox"/><br>1 | <input type="checkbox"/><br>2 | <input type="checkbox"/><br>3 | <input type="checkbox"/><br>4 | <input type="checkbox"/><br>5 |
| 13. The midwives/nurses independently follow the steps outlined in the standard.                                                                            | <input type="checkbox"/><br>0 | <input type="checkbox"/><br>1 | <input type="checkbox"/><br>2 | <input type="checkbox"/><br>3 | <input type="checkbox"/><br>4 | <input type="checkbox"/><br>5 |
| 14. The standard is accepted and implemented by all professional groups (midwives, nurses, physicians).                                                     | <input type="checkbox"/><br>0 | <input type="checkbox"/><br>1 | <input type="checkbox"/><br>2 | <input type="checkbox"/><br>3 | <input type="checkbox"/><br>4 | <input type="checkbox"/><br>5 |

|                                                                                                                                                                                  |                               |                               |                               |                               |                               |                               |
|----------------------------------------------------------------------------------------------------------------------------------------------------------------------------------|-------------------------------|-------------------------------|-------------------------------|-------------------------------|-------------------------------|-------------------------------|
| 15. Since the implementation of the standard, I have been paying more attention to ordering blood glucose measurements in at-risk neonates.                                      | <input type="checkbox"/><br>0 | <input type="checkbox"/><br>1 | <input type="checkbox"/><br>2 | <input type="checkbox"/><br>3 | <input type="checkbox"/><br>4 | <input type="checkbox"/><br>5 |
| 16. Since the implementation of the standard, I am paying more attention to ordering a blood glucose measurement in a neonate with clinical signs consistent with hypoglycaemia. | <input type="checkbox"/><br>0 | <input type="checkbox"/><br>1 | <input type="checkbox"/><br>2 | <input type="checkbox"/><br>3 | <input type="checkbox"/><br>4 | <input type="checkbox"/><br>5 |
| 17. Since the implementation of the standard, more neonates are transferred to the neonatal unit due to hypoglycaemia.                                                           | <input type="checkbox"/><br>0 | <input type="checkbox"/><br>1 | <input type="checkbox"/><br>2 | <input type="checkbox"/><br>3 | <input type="checkbox"/><br>4 | <input type="checkbox"/><br>5 |
| 18. The supplemental feeding foreseen in the standard has a negative impact on successful breastfeeding.                                                                         | <input type="checkbox"/><br>0 | <input type="checkbox"/><br>1 | <input type="checkbox"/><br>2 | <input type="checkbox"/><br>3 | <input type="checkbox"/><br>4 | <input type="checkbox"/><br>5 |
| 19. The designated measures are well accepted by parents.                                                                                                                        | <input type="checkbox"/><br>0 | <input type="checkbox"/><br>1 | <input type="checkbox"/><br>2 | <input type="checkbox"/><br>3 | <input type="checkbox"/><br>4 | <input type="checkbox"/><br>5 |
| 20. Parents understand that their baby may need to be transferred to the neonatal unit for profound or recurrent hypoglycaemia.                                                  | <input type="checkbox"/><br>0 | <input type="checkbox"/><br>1 | <input type="checkbox"/><br>2 | <input type="checkbox"/><br>3 | <input type="checkbox"/><br>4 | <input type="checkbox"/><br>5 |
| 21. Since the implementation of the standard, I regularly use dextrose gel to treat hypoglycaemia.                                                                               | <input type="checkbox"/><br>0 | <input type="checkbox"/><br>1 | <input type="checkbox"/><br>2 | <input type="checkbox"/><br>3 | <input type="checkbox"/><br>4 | <input type="checkbox"/><br>5 |
| 22. For neonates who have been treated with intravenous glucose for > 48 h, I perform a fasting test before discharge.                                                           | <input type="checkbox"/><br>0 | <input type="checkbox"/><br>1 | <input type="checkbox"/><br>2 | <input type="checkbox"/><br>3 | <input type="checkbox"/><br>4 | <input type="checkbox"/><br>5 |
| 23. In clinical practice, I notice that my colleagues are using the new standard.                                                                                                | <input type="checkbox"/><br>0 | <input type="checkbox"/><br>1 | <input type="checkbox"/><br>2 | <input type="checkbox"/><br>3 | <input type="checkbox"/><br>4 | <input type="checkbox"/><br>5 |
| 24. The new standard has become well established in everyday clinical practice.                                                                                                  | <input type="checkbox"/><br>0 | <input type="checkbox"/><br>1 | <input type="checkbox"/><br>2 | <input type="checkbox"/><br>3 | <input type="checkbox"/><br>4 | <input type="checkbox"/><br>5 |
| 25 I had the opportunity to attend training sessions for the new standard.                                                                                                       | <input type="checkbox"/><br>0 | <input type="checkbox"/><br>1 | <input type="checkbox"/><br>2 | <input type="checkbox"/><br>3 | <input type="checkbox"/><br>4 | <input type="checkbox"/><br>5 |

Do you have modification requests?      yes       no

Suggestions:

---



---



---



---

Further remarks/comments on the 'Diagnosis and Treatment Standard for Neonatal Hypoglycaemia (≥ 35+0 weeks of gestation)':

---



---



---



---

**Thank you for your participation!**
